# Supplementary material for: Practical Challenges and Opportunities for Marine Plastic Litter Reduction in Manila: A Structural Equation Modeling
Source: MDPI journal article supplement (doi:10.3390/su14106128), 2022-05-18
Supplement: s1 [file s1]

## Supplementary Material

### Practical Challenges and Opportunities for Marine Plastic Litter Reduction in Manila: Structural Equation Modeling

Table S1. Demographic characteristics of respondents.

| DEMOGRAPHICS VARIABLES              | Sample Size (n = 426) |            |
|-------------------------------------|-----------------------|------------|
|                                     | FREQUENCY             | PERCENTAGE |
| <b>Gender</b>                       |                       |            |
| Male                                | 152                   | 35.7       |
| Female                              | 274                   | 64.3       |
| <b>Age (Years)</b>                  |                       |            |
| Over 55 Years Old                   | 17                    | 4.0        |
| 45–54                               | 51                    | 12.0       |
| 35–44                               | 114                   | 26.8       |
| 25–34                               | 122                   | 28.6       |
| Under 25 Years Old                  | 122                   | 28.6       |
| <b>Educational Attainment</b>       |                       |            |
| Completed Graduate Studies          | 98                    | 23.0       |
| Completed Undergraduate Level       | 225                   | 52.8       |
| Completed Secondary Level           | 103                   | 24.2       |
| <b>Income*</b>                      |                       |            |
| Less Than 5,000 Pesos               |                       |            |
| 5,001–10,000 Pesos                  | 45                    | 10.6       |
| 10,001–15,000 Pesos                 | 174                   | 40.8       |
| 15,001–20,000 Pesos                 | 82                    | 19.2       |
| 20,001–25,000 Pesos                 | 47                    | 11.0       |
| More Than 25,000 Pesos              | 24                    | 5.6        |
| Less Than 5,000 Pesos               | 54                    | 12.7       |
| <b>Work Affiliation</b>             |                       |            |
| Barangay                            | 395                   | 92.7       |
| Manila DPS                          | 20                    | 4.7        |
| Enterprise/Private Sector           | 4                     | 0.9        |
| Association/NGO                     | 1                     | 0.2        |
| Others (Academe, Junkshop)          | 6                     | 1.4        |
| <b>Position of Work Affiliation</b> |                       |            |
| Barangay Chairman                   | 106                   | 24.9       |
| Barangay Secretary                  | 267                   | 62.7       |
| Barangay Councilor                  | 38                    | 8.9        |
| Technical Staff                     | 5                     | 1.2        |
| Others                              | 10                    | 2.3        |
| <b>Years of Work</b>                |                       |            |
| Under 5 Years                       | 241                   | 56.6       |
| 6–10 Years                          | 101                   | 23.7       |
| 11–15 Years                         | 42                    | 9.9        |
| 16–20 Years                         | 22                    | 5.2        |
| Over 20 Years                       | 20                    | 4.7        |

Exchange rate: 1 US\$ = 48 PhP (Pesos).

Table S2. Factors in MPL Reduction with mean, SD, Skewness, Kurtosis, factor loadings and Cronbach's Alpha.

| Latent Factor & Manifest indicator | Mean        | SD          | Skewness | Kurtosis | Factor Loading | Eigen Value | Explained Variance, % | Cronbach's Alpha |
|------------------------------------|-------------|-------------|----------|----------|----------------|-------------|-----------------------|------------------|
| <b>MPLr</b>                        | <b>3.38</b> | <b>0.65</b> |          |          |                | 13.377      | 20.268                | 0.957            |
| MPLsm5                             | 3.48        | 0.607       | −0.731   | −0.433   | 0.29           |             |                       |                  |
| MPLsm3                             | 3.46        | 0.640       | −0.772   | −0.434   | 0.819          |             |                       |                  |
| MPLsm9                             | 3.42        | 0.613       | −0.554   | −0.603   | 0.816          |             |                       |                  |
| MPLsm13                            | 3.32        | 0.678       | −0.503   | −0.781   | 0.811          |             |                       |                  |
| MPLsm4                             | 3.48        | 0.595       | −0.669   | −0.507   | 0.803          |             |                       |                  |
| MPLsm16                            | 3.48        | 0.626       | −0.798   | −0.372   | 0.792          |             |                       |                  |
| MPLsm2                             | 3.34        | 0.653       | −0.471   | −0.711   | 0.759          |             |                       |                  |
| MPLsm14                            | 3.43        | 0.648       | −0.693   | −0.542   | 0.742          |             |                       |                  |
| MPLsm10                            | 3.46        | 0.628       | −0.718   | −0.473   | 0.739          |             |                       |                  |
| MPLsm6                             | 3.26        | 0.672       | −363     | −0.808   | 0.736          |             |                       |                  |
| MPLsm12                            | 3.27        | 0.692       | −0.411   | −0.877   | 0.717          |             |                       |                  |
| MPLsm1                             | 3.27        | 0.651       | −0.336   | −0.728   | 0.709          |             |                       |                  |
| MPLsm11                            | 3.33        | 0.702       | −0.553   | −0.844   | 0.653          |             |                       |                  |
| <b>SE</b>                          | <b>3.60</b> | <b>0.53</b> |          |          |                | 7.270       | 11.015                | 0.879            |
| SEb5                               | 3.59        | 0.546       | −0.890   | −0.273   | 0.886          |             |                       |                  |
| SEb6                               | 3.60        | 0.544       | −0.945   | −0.164   | 0.847          |             |                       |                  |
| SEb2                               | 3.64        | 0.517       | −1.005   | −0.151   | 0.816          |             |                       |                  |
| SEb1                               | 3.65        | 0.533       | −1.183   | 0.390    | 0.792          |             |                       |                  |
| SEb3                               | 3.59        | 0.521       | −0.654   | −0.915   | 0.741          |             |                       |                  |

|               |             |             |        |        |       |       |       |       |
|---------------|-------------|-------------|--------|--------|-------|-------|-------|-------|
| SEb4          | 3.53        | 0.540       | -0.526 | -0.916 | 0.599 |       |       |       |
| <b>MPLe</b>   | <b>3.30</b> | <b>0.64</b> |        |        |       | 5.882 | 8.913 | 0.885 |
| MPLa5         | 3.19        | 0.662       | -0.233 | -0.759 | 0.851 |       |       |       |
| MPLa4         | 3.26        | 0.661       | -0.337 | -0.765 | 0.840 |       |       |       |
| MPLa2         | 3.26        | 0.621       | -0.244 | 0.619  | 0.811 |       |       |       |
| MPLa1         | 3.37        | 0.615       | -0.423 | -0.658 | 0.763 |       |       |       |
| MPLa3         | 3.42        | 0.621       | -0.592 | -0.582 | 0.713 |       |       |       |
| <b>CParty</b> | <b>3.57</b> | <b>0.57</b> |        |        |       | 3.100 | 4.697 | 0.913 |
| CP4           | 3.48        | 0.610       | -0.721 | -0.447 | 0.879 |       |       |       |
| CP3           | 3.62        | 0.555       | -1.087 | 0.183  | 0.864 |       |       |       |
| CP2           | 3.62        | 0.550       | -1.072 | 0.140  | 0.851 |       |       |       |
| CP5           | 3.49        | 0.607       | -0.767 | -0.389 | 0.782 |       |       |       |
| CP1           | 3.65        | 0.543       | -1.230 | 0.532  | 0.572 |       |       |       |
| <b>EG</b>     | <b>2.77</b> | <b>0.78</b> |        |        |       | 2.929 | 4.438 | 0.900 |
| EGa3          | 2.70        | 0.770       | -0.385 | -0.096 | 0.861 |       |       |       |
| EGa1          | 2.73        | 0.842       | -0.316 | -0.428 | 0.859 |       |       |       |
| EGa2          | 2.87        | 0.787       | -0.457 | -0.038 | 0.805 |       |       |       |
| EGa3F1        | 2.70        | 0.770       | -0.291 | 0.023  | 0.590 |       |       |       |
| EGa1l         | 2.86        | 0.714       | -0.297 | 0.009  | 0.539 |       |       |       |
| <b>EGcv</b>   | <b>3.20</b> | <b>0.67</b> |        |        |       | 2.227 | 3.374 | 0.904 |
| EGCV4         | 3.16        | 0.667       | -0.194 | -0.776 | 0.831 |       |       |       |
| EGCV5         | 3.26        | 0.647       | -0.311 | -0.714 | 0.815 |       |       |       |
| EGCV3         | 3.20        | 0.658       | -0.237 | -0.741 | 0.811 |       |       |       |
| EGCV1         | 3.17        | 0.693       | -0.238 | -0.912 | 0.786 |       |       |       |
| <b>SEa</b>    | <b>3.54</b> | <b>0.55</b> |        |        |       | 2.075 | 3.144 | 0.780 |
| SEa7          | 3.49        | 0.545       | -0.390 | -0.992 | 0.809 |       |       |       |
| SEa6          | 3.54        | 0.526       | -0.461 | -1.150 | 0.768 |       |       |       |
| SEa3          | 3.64        | 0.532       | -1.089 | 0.136  | 0.759 |       |       |       |
| SEa4          | 3.47        | 0.586       | -0.585 | -0.604 | 0.694 |       |       |       |
| <b>WInfra</b> | <b>2.50</b> | <b>0.95</b> |        |        |       | 1.801 | 2.729 | 0.791 |
| WI3           | 2.60        | 0.958       | 0.042  | -0.994 | 0.840 |       |       |       |
| WI2           | 2.49        | 0.988       | 0.129  | -1.018 | 0.829 |       |       |       |
| WI1           | 2.41        | 0.901       | 0.232  | -0.704 | 0.778 |       |       |       |
| <b>SEc</b>    | <b>2.61</b> | <b>0.80</b> |        |        |       | 1.618 | 2.451 | 0.708 |
| SEa1          | 2.78        | 0.773       | -0.330 | -0.153 | 0.867 |       |       |       |
| SEa2          | 2.44        | 0.819       | 0.042  | -0.512 | 0.849 |       |       |       |

Extraction Method: Principal Component Analysis. Total variance explained 68.022% for 13 factors. Bold magnitude are average means and average standard deviations.

Table S3. Results of Measurement Model (CFA) for the manifest and latent variables.

| Manifest <--- Latent | $\beta$ (8 factors) | $\beta$ (9 factors) | S.E.  | C.R.   | P-value |
|----------------------|---------------------|---------------------|-------|--------|---------|
| MPLsm5 <--- MPLr     | 0.834               | 0.816               |       |        |         |
| MPLsm3 <--- MPLr     | 0.810               | 0.807               | 0.054 | 19.378 | 0.000   |
| MPLsm9 <--- MPLr     | 0.826               | 0.827               | 0.051 | 20.057 | 0.000   |
| MPLsm13 <--- MPLr    | 0.750               | 0.759               | 0.059 | 17.75  | 0.000   |
| MPLsm4 <--- MPLr     | 0.816               | 0.796               | 0.042 | 22.546 | 0.000   |
| MPLsm16 <--- MPLr    | 0.769               | 0.773               | 0.054 | 18.227 | 0.000   |
| MPLsm2 <--- MPLr     | 0.720               | 0.719               | 0.057 | 16.532 | 0.000   |
| MPLsm14 <--- MPLr    | 0.724               | 0.717               | 0.057 | 16.459 | 0.000   |
| MPLsm6 <--- MPLr     | 0.712               | 0.679               | 0.06  | 15.337 | 0.000   |
| MPLsm10 <--- MPLr    | 0.674               | 0.727               | 0.055 | 16.775 | 0.000   |
| MPLsm12 <--- MPLr    | 0.646               | 0.653               | 0.063 | 14.565 | 0.000   |
| MPLsm1 <--- MPLr     | 0.675               | 0.678               | 0.058 | 15.302 | 0.000   |
| SEb5 <--- SE         | 0.849               | 0.848               |       |        |         |
| SEb6 <--- SE         | 0.815               | 0.816               | 0.05  | 19.134 | 0.000   |
| SEb2 <--- SE         | 0.703               | 0.704               | 0.05  | 15.699 | 0.000   |
| SEb1 <--- SE         | 0.682               | 0.683               | 0.052 | 15.081 | 0.000   |
| SEb3 <--- SE         | 0.705               | 0.705               | 0.05  | 15.796 | 0.000   |
| SEb4 <--- SE         | 0.631               | 0.631               | 0.054 | 13.701 | 0.000   |
| MPLa5 <--- MPLe      | 0.684               | 0.658               |       |        |         |
| MPLa4 <--- MPLe      | 0.753               | 0.720               | 0.059 | 18.588 | 0.000   |
| MPLa2 <--- MPLe      | 0.757               | 0.820               | 0.085 | 13.72  | 0.000   |
| MPLa1 <--- MPLe      | 0.737               | 0.803               | 0.084 | 13.536 | 0.000   |
| MPLa3 <--- MPLe      | 0.765               | 0.734               | 0.083 | 12.675 | 0.000   |
| CP4 <--- CParty      | 0.797               | 0.796               |       |        |         |
| CP3 <--- CParty      | 0.871               | 0.870               | 0.051 | 19.486 | 0.000   |
| CP2 <--- CParty      | 0.830               | 0.830               | 0.051 | 18.506 | 0.000   |
| CP5 <--- CParty      | 0.710               | 0.710               | 0.058 | 15.31  | 0.000   |
| CP1 <--- CParty      | 0.514               | 0.514               | 0.054 | 10.55  | 0.000   |
| EGCV4 <--- EGcv      | 0.766               | 0.766               |       |        |         |
| EGCV5 <--- EGcv      | 0.732               | 0.731               | 0.065 | 14.318 | 0.000   |
| EGCV3 <--- EGcv      | 0.791               | 0.792               | 0.066 | 15.375 | 0.000   |
| EGCV1 <--- EGcv      | 0.698               | 0.698               | 0.069 | 13.662 | 0.000   |

|       |      |         |       |       |       |        |       |
|-------|------|---------|-------|-------|-------|--------|-------|
| EGa3  | <--- | EG      | 0.763 | 0.763 |       |        |       |
| EGa1  | <--- | EG      | 0.746 | 0.746 | 0.077 | 13.891 | 0.000 |
| EGa2  | <--- | EG      | 0.706 | 0.706 | 0.071 | 13.252 | 0.000 |
| EGa11 | <--- | EG      | 0.658 | 0.658 | 0.064 | 12.403 | 0.000 |
| WI2   | <--- | WInfras | 0.769 | 0.752 |       |        |       |
| WI3   | <--- | WInfras | 0.752 | 0.769 | 0.088 | 11.242 | 0.000 |
| WI1   | <--- | WInfras | 0.655 | 0.655 | 0.072 | 10.966 | 0.000 |
| SEa7  | <--- | SEas    | 0.751 | 0.750 |       |        |       |
| SEa6  | <--- | SEas    | 0.684 | 0.683 | 0.076 | 11.576 | 0.000 |
| SEa4  | <--- | SEas    | 0.702 | 0.703 | 0.086 | 11.772 | 0.000 |

From EFA, 9 latent factors reduced to 8 latent factors.
